# Supplementary material
Source: PubMed Central journal article supplement (PMC5306408)
Supplement: 10815_2016_842_MOESM1_ESM.pdf [file 10815_2016_842_MOESM1_ESM.pdf]

**Proteomic profile of maternal aged blastocoel fluid suggests a novel role for ubiquitin system in blastocyst quality**

*Journal of Assisted Reproduction and Genetics*

Gabriella Tedeschi, Elena Albani, Elena Monica Borroni, Valentina Parini, Anna Maria Brucculeri, Elisa Maffioli, Armando Negri, Simona Nonnis, Mauro Maccarrone , Paolo Emanuele Levi-Setti

Corresponding author:

Elena Monica Borroni, Humanitas Clinical and Research Center

email: [elena.borroni@humanitasresearch.it](mailto:elena.borroni@humanitasresearch.it)

**Table S1: List of proteins discarded from the analysis.** Proteins identified in the control (containing only culture medium) and keratins likely due to a contamination during sample preparation, were discarded from the analysis.

| Protein IDs | Medium/Keratin                                                    |             |
|-------------|-------------------------------------------------------------------|-------------|
|             | Protein names                                                     | Gene names  |
| P04217      | Alpha-1B-glycoprotein                                             | A1BG        |
| P43652      | Afamin                                                            | AFM         |
| C9JV77      | Alpha-2-HS-glycoprotein                                           | AHSG        |
| P02768      | Serum albumin                                                     | ALB         |
| P25311      | Zinc-alpha-2-glycoprotein                                         | AZGP1       |
| Q6ISB3      | Grainyhead-like protein 2 homolog                                 | GRHL2       |
| P69905      | Hemoglobin subunit alpha                                          | HBA1        |
| P00738      | Haptoglobin                                                       | HP          |
| P02790      | Hemopexin                                                         | HPX         |
| P01876      | Ig alpha-1 chain C region                                         | IGHA1       |
| P04264      | Keratin, type II cytoskeletal 1                                   | KRT1        |
| P13645      | Keratin, type I cytoskeletal 10                                   | KRT10       |
| P02533      | Keratin, type I cytoskeletal 14                                   | KRT14       |
| P08779      | Keratin, type I cytoskeletal 16                                   | KRT16       |
| Q04695      | Keratin, type I cytoskeletal 17                                   | KRT17       |
| P35908      | Keratin, type II cytoskeletal 2 epidermal                         | KRT2        |
| P13647      | Keratin, type II cytoskeletal 5                                   | KRT5        |
| P02538      | Keratin, type II cytoskeletal 6A;Keratin, type II cytoskeletal 6C | KRT6A;KRT6C |
| Q7Z794      | Keratin, type II cytoskeletal 1b                                  | KRT77       |
| Q8N1N4      | Keratin, type II cytoskeletal 78                                  | KRT78       |
| Q9NSB4      | Keratin, type II cuticular Hb2                                    | KRT82       |
| P35527      | Keratin, type I cytoskeletal 9                                    | KRT9        |
| F8WCG0      | Myotubularin-related protein 14                                   | MTMR14      |
| P02763      | Alpha-1-acid glycoprotein 1                                       | ORM1        |
| A6NNF7      | Amiloride-sensitive sodium channel subunit delta                  | SCNN1D      |
| C9JNR7      | Septin-10                                                         | SEPT10      |
| P02787      | Serotransferrin                                                   | TF          |
| P02766      | Transthyretin                                                     | TTR         |
| E7EQ64      | Trypsin-1;Alpha-trypsin chain 1;Alpha-trypsin chain 2             | PRSS1       |
