# Supplementary material
Source: PubMed Central journal article supplement (PMC5306408)
Supplement: 10815_2016_842_MOESM2_ESM.pdf [file 10815_2016_842_MOESM2_ESM.pdf]

**Proteomic profile of maternal aged blastocoel fluid suggests a novel role for ubiquitin system in blastocyst quality**

*Journal of Assisted Reproduction and Genetics*

Gabriella Tedeschi, Elena Albani, Elena Monica Borroni, Valentina Parini, Anna Maria Brucculeri, Elisa Maffioli, Armando Negri, Simona Nonnis, Mauro Maccarrone , Paolo Emanuele Levi-Setti

Corresponding author:

Elena Monica Borroni, Humanitas Clinical and Research Center

email: [elena.borroni@humanitasresearch.it](mailto:elena.borroni@humanitasresearch.it)

**Table S2: List of proteins identified in group A by a shotgun approach.** Previous identification: in the Table the proteins previously identified in human blastocoel fluid (16, 17) are indicated with a capital X, while x indicates gene products previously experimentally detected at the protein level as secreted and/or present in extracellular region and/or in exosome and/or in microvesicles according to public available databases and dataset (www.neXtProt.org, www.exocarta.org, microvesicle.org, geneontology.org, www.proteinatlas.org, 29) or at the gene expression level from microarray data (16, 30) or at the transcription level in blastocystis or embryonic tissue according to <http://genomewidepdb.proteomix.org> or <https://www.ncbi.nlm.nih.gov/geoprofiles> databases. The table lists only the proteins present and quantified in at least 3 out of 5 technical repeats using a false positive rate of 0.05 and minimum peptide length 9 amino acids, reporting in a column the proteins identified with FDR 0.01.

| Protein IDs | Protein names                                                     | Gene names     | PEP      | Razor + unique peptides | FDR 1% | Previous identification |
|-------------|-------------------------------------------------------------------|----------------|----------|-------------------------|--------|-------------------------|
| P12273      | Prolactin-inducible protein                                       | PIP            | 5.24E-06 | 2                       | X      | X                       |
| Q8NBJ4      | Golgi membrane protein 1                                          | GOLM1          | 0.018711 | 1                       | X      | x                       |
| P01040      | Cystatin-A                                                        | CSTA           | 1.22E-08 | 2                       | X      | X                       |
| P20382      | Pro-MCH;Neuropeptide-glycine-glutamic acid;                       | PMCH           | 0.002462 | 1                       | X      | x                       |
| Q8TE76      | MORC family CW-type zinc finger protein 4                         | MORC4          | 0.018241 | 1                       | X      | x                       |
| Q8TE56      | A disintegrin and metalloproteinase with thrombospondin motifs 17 | ADAMTS17       | 0.022011 | 1                       | X      | x                       |
| D6R956      | Ubiquitin carboxyl-terminal hydrolase isozyme L1                  | UCHL1          | 0.004585 | 1                       |        | X                       |
| O95202      | LETM1 and EF-hand domain-containing protein 1, mitochondrial      | LETM1          | 0.028673 | 1                       |        | x                       |
| Q9UGM3      | Deleted in malignant brain tumors 1 protein                       | DMBT1          | 0.006933 | 1                       | X      | X                       |
| P31025      | Lipocalin-1;Putative lipocalin 1-like protein 1                   | LCN1;LCN1P1    | 1.85E-55 | 2                       | X      | X                       |
| Q6UWP8      | Suprabasin                                                        | SBSN           | 0.000208 | 1                       | X      | X                       |
| Q9BR77      | Coiled-coil domain-containing protein 77                          | CCDC77         | 0.009722 | 1                       | X      | x                       |
| Q96RW7      | Hemicentin-1                                                      | HMCN1          | 0.024825 | 1                       | X      | x                       |
| P31151      | Protein S100-A7;Protein S100-A7A                                  | S100A7;S100A7A | 3.14E-51 | 4                       | X      | X                       |
| H0Y7A7      | Calmodulin                                                        | CALM2;CALM1    | 0.005618 | 1                       | X      | x                       |
| Q6GMR7      | Fatty-acid amide hydrolase 2                                      | FAAH2          | 0.02707  | 1                       | X      | x                       |
| P19021      | Peptidyl-glycine alpha-amidating monoxygenase;                    | PAM            | 0.029696 | 1                       |        | x                       |
| O94788-3    | Retinal dehydrogenase 2                                           | ALDH1A2        | 0.026311 | 1                       |        | x                       |
| Q5VW26      | Nuclear factor 1;Nuclear factor 1 B-type                          | NFIB           | 0.01383  | 1                       |        | x                       |
| Q9BV73      | Centrosome-associated protein CEP250                              | CEP250         | 0.025154 | 1                       |        | X                       |
| Q9NZT1      | Calmodulin-like protein 5                                         | CALML5         | 8E-153   | 4                       | X      | X                       |
| P81605      | Dermcidin;Survival-promoting peptide;DCD-1                        | DCD            | 4.24E-08 | 2                       | X      | X                       |
| Q6PGQ7      | Protein aurora borealis                                           | BORA;FLJ22624  | 0.03061  | 1                       | X      | x                       |
| C9K0L2      | Maestro heat-like repeat-containing protein family member 7       | HEATR8         | 0.030121 | 1                       | X      | x                       |
| P61626      | Lysozyme C                                                        | LYZ            | 2.78E-23 | 1                       | X      | X                       |
| Q8N8E3      | Centrosomal protein of 112 kDa                                    | CEP112         | 0.008359 | 1                       | X      | x                       |

|          |                                                                      |                |          |   |   |   |
|----------|----------------------------------------------------------------------|----------------|----------|---|---|---|
| Q9BY89   | Uncharacterized protein KIAA1671                                     | KIAA1671       | 0.012704 | 1 |   | x |
| Q96F24   | Nuclear receptor-binding factor 2                                    | NRBF2          | 0.005732 | 1 | X | x |
| E7ERA6   | RING finger protein 223                                              | RNF223         | 0.028835 | 1 | X |   |
| F8W8U3   | Homeobox protein Meis1                                               | MEIS1          | 0.031584 | 1 |   | x |
| P0CG48   | Polyubiquitin-C;Ubiquitin;Polyubiquitin-B                            | UBC;UBB        | 0.001463 | 1 | X | X |
| Q6JVE6   | Epididymal-specific lipocalin-10                                     | LCN10          | 0.027122 | 1 |   | x |
| Q9HCJ0   | Trinucleotide repeat-containing gene 6C protein                      | TNRC6C         | 0.02214  | 1 | X | x |
| F8W878   | Brain-specific angiogenesis inhibitor 1-associated protein 2         | BAIAP2         | 0.018041 | 1 | X | x |
| P05109   | Protein S100-A8                                                      | S100A8         | 3.51E-69 | 2 | X | X |
| Q13635-4 | Isoform S of Protein patched homolog 1                               | PTCH1          | 0.0054   | 1 | X | x |
| Q8NBP5   | Major facilitator superfamily domain-containing protein 9            | MFSD9          | 0.024966 | 1 | X | x |
| F8WCM5   | Insulin;Insulin B chain;Insulin A chain                              | INS-IGF2;INS   | 6.49E-07 | 1 | X | X |
| G8JLG2   | Corneodesmosin                                                       | CDSN           | 0.018446 | 1 |   | X |
| P01566   | Interferon alpha-10;Interferon alpha-21;                             | IFNA10;IFNA21  | 0.03168  | 1 | X | x |
| P22732   | Solute carrier family 2, facilitated glucose transporter member 5    | SLC2A5         | 0.028098 | 1 |   | x |
| Q8TAL5   | Uncharacterized protein C9orf43                                      | C9orf43        | 0.028085 | 1 |   | x |
| J3KNN1   | Polypeptide N-acetylgalactosaminyltransferase 9                      | GALNT9         | 0.024813 | 1 | X |   |
| Q02413   | Desmoglein-1                                                         | DSG1           | 2.58E-31 | 2 | X | X |
| P14923   | Junction plakoglobin                                                 | JUP            | 5.14E-15 | 2 | X | X |
| Q8NI35-5 | Isoform 5 of InaD-like protein                                       | INADL          | 0.018277 | 1 |   | x |
| G3V314   | Ena/VASP-like protein                                                | EVL            | 0.03031  | 1 |   | x |
| Q12972-3 | Isoform Gamma of Nuclear inhibitor of protein phosphatase 1          | PPP1R8         | 0.031102 | 1 |   | x |
| Q9HCE0   | Ectopic P granules protein 5 homolog                                 | EPG5           | 0.030831 | 1 |   | x |
| Q76G19   | PDZ domain-containing protein 4                                      | PDZD4          | 5.95E-15 | 2 | X | x |
| Q5T749   | Keratinocyte proline-rich protein                                    | KPRP           | 5.50E-12 | 5 | X | X |
| H3BUN7   | SH2B adapter protein 1                                               | SH2B1          | 0.017553 | 1 | X | x |
| H0YNB0   | Unconventional myosin-Ie                                             | MYO1E          | 0.022468 | 1 |   | x |
| J3KMZ5   | Serotonin N-acetyltransferase                                        | AANAT          | 0.014783 | 1 |   | x |
| P28290   | Sperm-specific antigen 2                                             | SSFA2          | 0.015064 | 1 | X | x |
| Q6ZU67   | BEN domain-containing protein 4                                      | BEND4          | 0.029939 | 1 |   | x |
| Q9H1N7   | Adenosine 3-phospho 5-phosphosulfate transporter 2                   | SLC35B3        | 0.023363 | 1 |   | x |
| P05060   | Secretogranin-1;GAWK peptide;CCB peptide                             | CHGB           | 0.023689 | 1 | X | x |
| Q9NZN9-5 | Isoform 5 of Methionine adenosyltransferase 2 subunit beta           | MAT2B          | 0.02745  | 1 |   | x |
| Q9UHD9   | Ubiquilin-2                                                          | UBQLN2         | 0.02898  | 1 | X | x |
| Q96NH3-4 | Protein broad-minded                                                 | BROMI;C6orf170 | 0.011429 | 1 | X | x |
| P46060   | Ran GTPase-activating protein 1                                      | RANGAP1        | 0.020731 | 1 |   | x |
| Q9H1K1-2 | Isoform 2 of Iron-sulfur cluster assembly enzyme ISCU, mitochondrial | ISCU           | 0.029122 | 1 |   | x |
| P04745   | Alpha-amylase 1;Pancreatic alpha-amylase                             | AMY1A;AMY2A    | 0.016273 | 1 |   | X |
| B4DIP4   | Eukaryotic translation initiation factor 2-alpha kinase 1            | EIF2AK1        | 0.024445 | 1 |   | x |
| Q9NYL2-  | Isoform 2 of Mitogen-activated protein                               | ZAK            | 0.010561 | 1 |   | x |

|          |                                                                             |          |          |   |   |  |   |
|----------|-----------------------------------------------------------------------------|----------|----------|---|---|--|---|
| 2        | kinase kinase kinase MLT                                                    |          |          |   |   |  |   |
| B4DYB5   | cDNA FLJ53372                                                               | SPAG16   | 0.025535 | 1 |   |  |   |
| B7Z8Z7   | RNA-binding protein 47                                                      | RBM47    | 0.02829  | 1 |   |  | x |
| F5H1U9   | Multiple PDZ domain protein                                                 | MPDZ     | 0.03135  | 1 | X |  | x |
| P06454   | Prothymosin alpha;Thymosin alpha-1                                          | PTMA     | 0.001343 | 1 | X |  | X |
| C9JH18   | PERQ amino acid-rich with GYF domain-containing protein 2                   | GIGYF2   | 0.000158 | 2 |   |  | x |
| C9JNL6   | Electrogenic sodium bicarbonate cotransporter 4                             | SLC4A5   | 0.014409 | 1 |   |  | x |
| C9JSC0   | POU domain, class 6, transcription factor 2                                 | POU6F2   | 0.029639 | 1 |   |  | x |
| Q96BQ5   | Coiled-coil domain-containing protein 127                                   | CCDC127  | 0.031674 | 1 | X |  | x |
| Q9NQ38   | Serine protease inhibitor Kazal-type 5                                      | SPINK5   | 0.001557 | 1 | X |  | x |
| E7ENK3   | Glutamate receptor, ionotropic kainate 1                                    | GRIK1    | 0.027858 | 1 |   |  | x |
| Q13201   | Multimerin-1;Platelet glycoprotein Ia*;155 kDa platelet multimerin          | MMRN1    | 0.024454 | 1 | X |  | x |
| P02788   | Lactotransferrin;Kaliocin-1;Lactoferroxin-A;Lactoferroxin-B;Lactoferroxin-C | LTF      | 0.004647 | 1 | X |  | X |
| P04406   | Glyceraldehyde-3-phosphate dehydrogenase                                    | GAPDH    | 2.45E-07 | 3 | X |  | X |
| P11532   | Dystrophin                                                                  | DMD      | 0.015725 | 1 |   |  | x |
| E9PQB1   | Serine/arginine repetitive matrix protein 5                                 | SRRM5    | 0.015627 | 1 | X |  | x |
| Q9UKR0   | Kallikrein-12                                                               | KLK12    | 0.02885  | 1 |   |  | x |
| F8WAU4   | Elongation factor G, mitochondrial                                          | GFM1     | 0.014496 | 1 | X |  | x |
| F8WCP6   | Kinesin-like protein KIF21A                                                 | KIF21A   | 0.029222 | 1 |   |  | x |
| Q9P0W5-4 | Schwannomin-interacting protein 1                                           | SCHIP1   | 0.028326 | 1 |   |  | x |
| H0Y3B9   | BTB/POZ domain-containing protein KCTD2                                     | KCTD2    | 0.027761 | 1 | X |  | x |
| H0Y7H7   | Dedicator of cytokinesis protein 4                                          | DOCK4    | 0.030214 | 1 |   |  | x |
| Q13535   | Serine/threonine-protein kinase ATR                                         | ATR      | 0.024667 | 1 |   |  | x |
| Q6FIF0   | AN1-type zinc finger protein 6                                              | ZFAND6   | 0.030174 | 1 |   |  | x |
| P14618   | Pyruvate kinase isozymes M1/M2;Pyruvate kinase                              | PKM2     | 0.000118 | 2 | X |  | X |
| J9JIC5   | Protein Njmu-R1                                                             | C17orf75 | 0.031192 | 1 | X |  | x |
| Q96DH6   | RNA-binding protein Musashi homolog 2                                       | MSI2     | 0.007825 | 1 |   |  | x |
| K7EKM7   | Small integral membrane protein 24                                          | SMIM24   | 0.009651 | 1 | X |  | x |
| M0QXR7   | Leucine-rich repeat-containing protein 63                                   | LRRC63   | 0.020219 | 1 |   |  |   |
| O00555   | Voltage-dependent P/Q-type calcium channel subunit alpha-1A                 | CACNA1A  | 0.000283 | 2 | X |  | x |
| O60320-2 | Isoform 2 of Protein FAM189A1                                               | FAM189A1 | 0.012422 | 1 |   |  | x |
| O75556   | Mammaglobin-B                                                               | SCGB2A1  | 0.030478 | 1 |   |  | x |
| O76042   | Putative uncharacterized protein C3orf51                                    | C3orf51  | 0.01043  | 1 | X |  |   |
| P05089   | Arginase-1                                                                  | ARG1     | 0.000272 | 2 | X |  | X |
| P06702   | Protein S100-A9                                                             | S100A9   | 8.91E-09 | 3 | X |  | X |
| P06733   | Alpha-enolase                                                               | ENO1     | 2.54E-06 | 2 |   |  | X |
| P11047   | Laminin subunit gamma-1                                                     | LAMC1    | 0.029392 | 1 |   |  | x |
| P15924   | Desmoplakin                                                                 | DSP      | 3.07E-21 | 7 | X |  | X |
| P31944   | Caspase-14;Caspase-14 subunit p19;Caspase-14 subunit p10                    | CASP14   | 3.99E-26 | 4 | X |  | X |
| P51843   | Nuclear receptor subfamily 0 group B member 1                               | NR0B1    | 0.013215 | 1 |   |  | x |

|          |                                                               |          |          |   |   |   |
|----------|---------------------------------------------------------------|----------|----------|---|---|---|
| P52740   | Zinc finger protein 132                                       | ZNF132   | 0.002584 | 1 | X | x |
| Q5VWC4   | 26S proteasome non-ATPase regulatory subunit 4                | PSMD4    | 0.031718 | 1 |   | x |
| Q00994-2 | Isoform 2 of Protein BEX3                                     | NGFRAP1  | 0.008688 | 1 |   | x |
| Q01469   | Fatty acid-binding protein, epidermal                         | FABP5    | 1.08E-24 | 2 | X | X |
| Q08188   | Protein-glutamine gamma-glutamyltransferase E;                | TGM3     | 0.011907 | 1 |   | X |
| Q08554   | Desmocollin-1                                                 | DSC1     | 2.80E-06 | 3 | X | X |
| Q12778   | Forkhead box protein O1                                       | FOXO1    | 0.007693 | 1 |   | x |
| Q13164-4 | Mitogen-activated protein kinase 7                            | MAPK7    | 0.027772 | 1 | X | x |
| Q13422-4 | DNA-binding protein Ikaros                                    | IKZF1    | 0.021892 | 1 |   |   |
| Q13542   | Eukaryotic translation initiation factor 4E-binding protein 2 | EIF4EBP2 | 0.020583 | 1 | X | x |
| Q14764   | Major vault protein                                           | MVP      | 1.25E-07 | 4 | X | X |
| Q3SYA6   | MAGEC3 protein                                                | MAGEC3   | 0.027463 | 1 |   |   |
| Q5D862   | Filaggrin-2                                                   | FLG2     | 0.000426 | 2 | X | X |
| Q5GH76   | XK-related protein 4                                          | XKR4     | 0.008783 | 1 | X |   |
| Q5HYA8   | Meckelin                                                      | TMEM67   | 0.010896 | 1 |   | x |
| Q5HYK7   | SH3 domain-containing protein 19                              | SH3D19   | 0.012887 | 1 | X | x |
| Q5T2D2   | Trem-like transcript 2 protein                                | TREML2   | 0.025847 | 1 |   | x |
| Q5T750   | Skin-specific protein 32                                      | XP32     | 0.016572 | 1 |   | X |
| Q5TA76   | Late cornified envelope protein 3A                            | LCE3A    | 0.024214 | 1 |   |   |
| Q6TDP4   | Kelch-like protein 17                                         | KLHL17   | 0.024283 | 1 |   | x |
| Q9UJQ4   | Sal-like protein 4                                            | SALL4    | 0.024516 | 1 |   | x |
| Q86YZ3   | Hornerin                                                      | HRNR     | 3.22E-10 | 2 | X | X |
| Q8N139   | ATP-binding cassette sub-family A member 6                    | ABCA6    | 0.014869 | 1 | X | x |
| Q96B36-3 | Isoform 3 of Proline-rich AKT1 substrate                      | AKT1S1   | 0.028634 | 1 |   | x |
| Q9BSM1   | Polycomb group RING finger protein 1                          | PCGF1    | 0.023367 | 1 | X | x |
| Q9BTT4   | Mediator of RNA polymerase II transcription subunit 10        | MED10    | 0.003212 | 1 | X | x |
| Q9H3U1   | Protein unc-45 homolog A                                      | UNC45A   | 0.011958 | 1 |   | x |
