# Supplementary material
Source: PubMed Central journal article supplement (PMC5306408)
Supplement: 10815_2016_842_MOESM3_ESM.pdf [file 10815_2016_842_MOESM3_ESM.pdf]

**Proteomic profile of maternal aged blastocoel fluid suggests a novel role for ubiquitin system in blastocyst quality**

*Journal of Assisted Reproduction and Genetics*

Gabriella Tedeschi, Elena Albani, Elena Monica Borroni, Valentina Parini, Anna Maria Brucculeri, Elisa Maffioli, Armando Negri, Simona Nonnis, Mauro Maccarrone , Paolo Emanuele Levi-Setti

Corresponding author:

Elena Monica Borroni, Humanitas Clinical and Research Center

email: [elena.borroni@humanitasresearch.it](mailto:elena.borroni@humanitasresearch.it)

**Table S3: List of proteins identified in group B by a shotgun approach.** Previous identification: in the Table the proteins previously identified in human blastocoel fluid (16, 17) are indicated with a capital X, while x indicates gene products previously experimentally detected at the protein level as secreted and/or present in extracellular region and/or in exosome and/or in microvesicles according to public available databases and dataset (www.neXtProt.org, www.exocarta.org, microvesicle.org, geneontology.org, www.proteinatlas.org, 29) or at the gene expression level from microarray data (16, 30) or at the transcription level in blastocystis or embryonic tissue according to <http://genomewidepdb.proteomix.org> or <https://www.ncbi.nlm.nih.gov/geoprofiles> databases. The table lists only the proteins present and quantified in at least 3 out of 5 technical repeats using a false positive rate of 0.05 and minimum peptide length 9 amino acids, reporting in a column the proteins identified with FDR 0.01.

| <b>Protein IDs</b> | <b>Protein names</b>                                              | <b>Gene names</b> | <b>PEP</b> | <b>Razor + unique peptides</b> | <b>FDR 1%</b> | <b>Previous identification</b> |
|--------------------|-------------------------------------------------------------------|-------------------|------------|--------------------------------|---------------|--------------------------------|
| P12273             | Prolactin-inducible protein                                       | PIP               | 5.24E-06   | 2                              | X             | X                              |
| Q8NBJ4             | Golgi membrane protein 1                                          | GOLM1             | 0.018711   | 1                              | X             | x                              |
| P01040             | Cystatin-A                                                        | CSTA              | 1.22E-08   | 2                              | X             | X                              |
| P20382             | Pro-MCH;Neuropeptide-glycine-glutamic acid                        | PMCH              | 0.002462   | 1                              | X             | x                              |
| Q8TE76             | MORC family CW-type zinc finger protein 4                         | MORC4             | 0.018241   | 1                              | X             | x                              |
| Q8TE56             | A disintegrin and metalloproteinase with thrombospondin motifs 17 | ADAMTS17          | 0.022011   | 1                              | X             | x                              |
| D6R956             | Ubiquitin carboxyl-terminal hydrolase isozyme L1                  | UCHL1             | 0.004585   | 1                              |               | X                              |
| O95202             | LETM1 and EF-hand domain-containing protein 1, mitochondrial      | LETM1             | 0.028673   | 1                              |               | x                              |
| Q9UGM3             | Deleted in malignant brain tumors 1 protein                       | DMBT1             | 0.006933   | 1                              | X             | X                              |
| P31025             | Lipocalin-1;Putative lipocalin 1-like protein 1                   | LCN1;LCN1P1       | 1.85E-55   | 2                              | X             | X                              |
| Q6UWP8             | Suprabasin                                                        | SBSN              | 0.000208   | 1                              | X             | X                              |
| Q9BR77             | Coiled-coil domain-containing protein 77                          | CCDC77            | 0.009722   | 1                              | X             | x                              |
| Q96RW7             | Hemicentin-1                                                      | HMCN1             | 0.024825   | 1                              | X             | x                              |
| P31151             | Protein S100-A7;Protein S100-A7A                                  | S100A7;S100A7A    | 3.14E-51   | 4                              | X             | X                              |
| H0Y7A7             | Calmodulin                                                        | CALM2;CALM1       | 0.005618   | 1                              | X             | x                              |
| Q6GMR7             | Fatty-acid amide hydrolase 2                                      | FAAH2             | 0.02707    | 1                              | X             | x                              |
| P19021             | Peptidyl-glycine alpha-amidating monooxygenase                    | PAM               | 0.029696   | 1                              |               | x                              |
| O94788-3           | Isoform 3 of Retinal dehydrogenase 2                              | ALDH1A2           | 0.026311   | 1                              | X             | x                              |
| Q5VW26             | Nuclear factor 1;Nuclear factor 1 B-type                          | NFIB              | 0.01383    | 1                              |               | x                              |
| Q9BV73             | Centrosome-associated protein CEP250                              | CEP250            | 0.025154   | 1                              |               | X                              |
| Q9NZT1             | Calmodulin-like protein 5                                         | CALML5            | 8E-153     | 4                              | X             | X                              |
| P81605             | Dermcidin;Survival-promoting peptide;DCD-1                        | DCD               | 4.24E-08   | 2                              | X             | X                              |

|          |                                                                   |               |          |   |   |   |
|----------|-------------------------------------------------------------------|---------------|----------|---|---|---|
| Q6PGQ7   | Protein aurora borealis                                           | BORA;FLJ22624 | 0.03061  | 1 | X | x |
| C9K0L2   | Maestro heat-like repeat-containing protein family member 7       | HEATR8        | 0.030121 | 1 | X |   |
| P61626   | Lysozyme C                                                        | LYZ           | 2.78E-23 | 1 | X | X |
| Q8N8E3   | Centrosomal protein of 112 kDa                                    | CEP112        | 0.008359 | 1 | X |   |
| Q9BY89   | Uncharacterized protein                                           | KIAA1671      | 0.012704 | 1 |   | x |
| Q96F24-2 | Nuclear receptor-binding factor 2                                 | NRBF2         | 0.005732 | 1 | X | x |
| E7ERA6   | RING finger protein 223                                           | RNF223        | 0.028835 | 1 | X |   |
| F8W8U3   | Homeobox protein Meis1                                            | MEIS1         | 0.031584 | 1 |   | x |
| P0CG48   | Polyubiquitin-C;Ubiquitin;Polyubiquitin-B                         | UBC;UBB       | 0.001463 | 1 | X | X |
| Q6JVE6   | Epididymal-specific lipocalin-10                                  | LCN10         | 0.027122 | 1 |   | x |
| Q9HCJ0   | Trinucleotide repeat-containing gene 6C protein                   | TNRC6C        | 0.02214  | 1 | X | x |
| F8W878   | Brain-specific angiogenesis inhibitor 1-associated protein 2      | BAIAP2        | 0.018041 | 1 | X | x |
| P05109   | Protein S100-A8                                                   | S100A8        | 3.51E-69 | 2 | X | X |
| Q13635-4 | Isoform S of Protein patched homolog 1                            | PTCH1         | 0.0054   | 1 | X | x |
| Q8NBP5   | Major facilitator superfamily domain-containing protein 9         | MFSD9         | 0.024966 | 1 | X | x |
| F8WCM5   | Insulin;Insulin B chain;Insulin A chain                           | INS-IGF2;INS  | 6.49E-07 | 1 | X | X |
| G8JLG2   | Corneodesmosin                                                    | CDSN          | 0.018446 | 1 |   | X |
| P01566   | Interferon alpha-10;Interferon alpha-21                           | IFNA10;IFNA21 | 0.03168  | 1 | X | x |
| P22732   | Solute carrier family 2, facilitated glucose transporter member 5 | SLC2A5        | 0.028098 | 1 |   | x |
| Q8TAL5   | Uncharacterized protein C9orf43                                   | C9orf43       | 0.028085 | 1 |   | x |
| J3KNN1   | Polypeptide N-acetylgalactosaminyltransferase 9                   | GALNT9        | 0.024813 | 1 | X |   |
| Q02413   | Desmoglein-1                                                      | DSG1          | 2.58E-31 | 2 | X | X |
| Q8NI35-5 | Isoform 5 of InaD-like protein                                    | INADL         | 0.018277 | 1 |   | x |
| G3V314   | Ena/VASP-like protein                                             | EVL           | 0.03031  | 1 |   | x |
| Q12972-3 | Isoform Gamma of Nuclear inhibitor of protein phosphatase 1       | PPP1R8        | 0.031102 | 1 |   | x |
| Q9HCE0   | Ectopic P granules protein 5 homolog                              | EPG5          | 0.030831 | 1 |   | x |
| Q76G19   | PDZ domain-containing protein 4                                   | PDZD4         | 5.95E-15 | 2 | X | x |
| Q5T749   | Keratinocyte proline-rich protein                                 | KPRP          | 5.50E-12 | 5 | X | X |
| H3BUN7   | SH2B adapter protein 1                                            | SH2B1         | 0.017553 | 1 | X | x |
| H0YNB0   | Unconventional myosin-Ie                                          | MYO1E         | 0.022468 | 1 |   | x |
| J3KMZ5   | Serotonin N-acetyltransferase                                     | AANAT         | 0.014783 | 1 |   | x |
| P28290   | Sperm-specific antigen 2                                          | SSFA2         | 0.015064 | 1 | X | x |
| Q6ZU67   | BEN domain-containing protein 4                                   | BEND4         | 0.029939 | 1 |   | x |
| Q9H1N7   | Adenosine 3-phospho 5-phosphosulfate transporter 2                | SLC35B3       | 0.023363 | 1 |   | x |
| P05060   | Secretogranin-1;GAWK peptide;CCB peptide                          | CHGB          | 0.023689 | 1 | X | x |
| Q9NZL9-5 | Isoform 5 of Methionine                                           | MAT2B         | 0.02745  | 1 |   | x |

|          |                                                                          |                     |          |   |   |   |
|----------|--------------------------------------------------------------------------|---------------------|----------|---|---|---|
|          | adenosyltransferase 2 subunit<br>beta                                    |                     |          |   |   |   |
| Q9UHD9   | Ubiquilin-2                                                              | UBQLN2              | 0.02898  | 1 | X | x |
| Q96NH3   | Protein broad-minded                                                     | BROMI;C6orf170      | 0.011429 | 1 | X | x |
| A6NKX1   | Putative uncharacterized protein<br>CXorf52B                             | NCRNA00204          | 0.028229 | 1 | X |   |
| B4DR52   | Histone H2B;Histone H2B type<br>1-K                                      | HIST2H2BF;HIST1H2BK | 4.95E-25 | 1 | X | X |
| B4DYB5   | cDNA FLJ53372                                                            | SPAG16              | 0.025535 | 1 |   |   |
| B7Z8Z7   | RNA-binding protein 47                                                   | RBM47               | 0.02829  | 1 |   | x |
| P06454   | Prothymosin alpha;Thymosin<br>alpha-1                                    | PTMA                | 0.001343 | 1 | X | X |
| Q9UJ42   | Probable G-protein coupled<br>receptor 160                               | GPR160              | 0.009327 | 1 | X | x |
| C9JH18   | PERQ amino acid-rich with GYF<br>domain-containing protein 2             | GIGYF2              | 0.000158 | 2 |   | x |
| C9JSC0   | POU domain, class 6,<br>transcription factor 2                           | POU6F2              | 0.029639 | 1 |   | x |
| Q96BQ5   | Coiled-coil domain-containing<br>protein 127                             | CCDC127             | 0.031674 | 1 | X | x |
| E7ENK3   | Glutamate receptor, ionotropic<br>kainate 1                              | GRIK1               | 0.027858 | 1 |   | x |
| Q13201   | Multimerin-1;Platelet<br>glycoprotein Ia*;155 kDa platelet<br>multimerin | MMRN1               | 0.024454 | 1 | X | x |
| P04406   | Glyceraldehyde-3-phosphate<br>dehydrogenase                              | GAPDH               | 2.45E-07 | 3 | X | X |
| P11532   | Dystrophin                                                               | DMD                 | 0.015725 | 1 |   | x |
| E9PQB1   | Serine/arginine repetitive matrix<br>protein 5                           | SRRM5               | 0.015627 | 1 | X | x |
| Q96DR8   | Mucin-like protein 1                                                     | MUCL1               | 0.010421 | 1 | X | X |
| F8WAU4   | Elongation factor G,<br>mitochondrial                                    | GFM1                | 0.014496 | 1 | X | x |
| Q9P0W5-4 | Schwannomin-interacting protein<br>1                                     | SCHIP1              | 0.028326 | 1 |   | x |
| H0Y3T1   | Protein CROC-4                                                           | C1orf61             | 0.031572 | 1 |   | x |
| P14618   | Pyruvate kinase isozymes<br>M1/M2;Pyruvate kinase                        | PKM2                | 0.000118 | 2 | X | X |
| Q96ST8   | Centrosomal protein of 89 kDa                                            | CEP89               | 0.03077  | 1 |   | x |
| K7EKM7   | Small integral membrane protein<br>24                                    | SMIM24              | 0.009651 | 1 | X | x |
| M0QXR7   | Leucine-rich repeat-containing<br>protein 63                             | LRRC63              | 0.020219 | 1 |   |   |
| O00555   | Voltage-dependent P/Q-type<br>calcium channel subunit alpha-<br>1A       | CACNA1A             | 0.000283 | 2 | X |   |
| O75553-5 | Disabled homolog 1                                                       | DAB1                | 0.029822 | 1 |   | x |
| O75665   | Oral-facial-digital syndrome 1<br>protein                                | OFD1                | 0.000409 | 2 |   | x |
| P16104   | Histone H2A.x;Histone H2A<br>type 1-A                                    | H2AFX;HIST1H2AA     | 1.95E-29 | 2 | X | X |
| P05089   | Arginase-1                                                               | ARG1                | 0.000272 | 2 | X | X |
| P06702   | Protein S100-A9                                                          | S100A9              | 8.91E-09 | 3 | X | X |
| P06733   | Alpha-enolase                                                            | ENO1                | 2.54E-06 | 2 | X | X |

|          |                                                                  |               |          |   |   |   |
|----------|------------------------------------------------------------------|---------------|----------|---|---|---|
| P14923   | Junction plakoglobin                                             | JUP           | 5.14E-15 | 2 | X | X |
| P15924   | Desmoplakin                                                      | DSP           | 3.07E-21 | 7 | X | X |
| P31944   | Caspase-14;Caspase-14 subunit p19;Caspase-14 subunit p10         | CASP14        | 3.99E-26 | 4 | X | X |
| P48431   | Transcription factor SOX-2                                       | SOX2          | 0.027433 | 1 | X | x |
| P51654   | Glypican-3;Secreted glypican-3                                   | GPC3          | 0.031467 | 1 |   | x |
| P52740   | Zinc finger protein 132                                          | ZNF132        | 0.002584 | 1 | X | x |
| P62805   | Histone H4                                                       | HIST1H4A      | 0.006819 | 1 | X | X |
| Q05639   | Elongation factor 1-alpha 2;Elongation factor 1-alpha 1;         | EEF1A2;EEF1A1 | 0.000444 | 1 | X | X |
| Q01469   | Fatty acid-binding protein, epidermal                            | FABP5         | 1.08E-24 | 2 | X | X |
| Q08188   | Protein-glutamine gamma-glutamyltransferase E;                   | TGM3          | 0.011907 | 1 |   | X |
| Q08554   | Desmocollin-1                                                    | DSC1          | 2.80E-06 | 3 | X | X |
| Q12778   | Forkhead box protein O1                                          | FOXO1         | 0.007693 | 1 |   | x |
| Q13164-4 | Mitogen-activated protein kinase 7                               | MAPK7         | 0.027772 | 1 | X | x |
| Q13422-4 | DNA-binding protein Ikaros                                       | IKZF1         | 0.021892 | 1 |   |   |
| Q14764   | Major vault protein                                              | MVP           | 1.25E-07 | 4 | X | X |
| Q15147   | 1-phosphatidylinositol 4,5-bisphosphate phosphodiesterase beta-4 | PLCB4         | 1.58E-19 | 2 |   | x |
| Q5D862   | Filaggrin-2                                                      | FLG2          | 0.000426 | 2 |   | X |
| Q5HYA8   | Meckelin                                                         | TMEM67        | 0.010896 | 1 |   | x |
| Q5HYK7   | SH3 domain-containing protein 19                                 | SH3D19        | 0.012887 | 1 | X | x |
| Q5J5C9   | Beta-defensin 121                                                | DEFB121       | 0.031279 | 1 |   | x |
| Q5T750   | Skin-specific protein 32                                         | XP32          | 0.016572 | 1 |   | X |
| Q5TA76   | Late cornified envelope protein 3A                               | LCE3A         | 0.024214 | 1 |   |   |
| Q9UJQ4   | Sal-like protein 4                                               | SALL4         | 0.024516 | 1 |   | x |
| Q86YZ3   | Hornerin                                                         | HRNR          | 3.22E-10 | 2 | X | X |
| Q8N139   | ATP-binding cassette sub-family A member 6                       | ABCA6         | 0.014869 | 1 | X | x |
| Q9BTT4   | Mediator of RNA polymerase II transcription subunit 10           | MED10         | 0.003212 | 1 | X | x |
| Q9H6A9   | Pecanex-like protein 3                                           | PCNXL3        | 0.018665 | 1 |   | x |
