# Supplementary material
Source: PubMed Central journal article supplement (PMC5306408)
Supplement: 10815_2016_842_MOESM4_ESM.pdf [file 10815_2016_842_MOESM4_ESM.pdf]

## **Proteomic profile of maternal aged blastocoel fluid suggests a novel role for ubiquitin system in blastocyst quality**

*Journal of Assisted Reproduction and Genetics*

Gabriella Tedeschi, Elena Albani, Elena Monica Borroni, Valentina Parini, Anna Maria Brucculeri, Elisa Maffioli, Armando Negri, Simona Nonnis, Mauro Maccarrone, Paolo Emanuele Levi-Setti

Corresponding author:

Elena Monica Borroni, Humanitas Clinical and Research Center

email: [elena.borroni@humanitasresearch.it](mailto:elena.borroni@humanitasresearch.it)

**Table S4: Functional analysis of differentially expressed proteins.** The proteins were manually grouped according to their function in biological processes taking into account, besides GOMF, GOBP and GOCC, also keywords and annotations known from the literature. It was therefore possible to ascribe each protein to 6 major groups: 1) fertilization and embryo implantation, 2) embryo development, 3) nucleic acid interaction, 4) signaling, 5) uncharacterized proteins. Proteins excluded from the groups listed above were categorized as “other”. The table lists only the proteins present and quantified in at least 3 out of 5 technical repeats using a false positive rate of 0.05 and minimum peptide length 9 amino acids, reporting bold the proteins identified with FDR 0.01.

| Under expressed in B or present only in A                   |             |                       | Over expressed or present only in B                                         |           |                |                                        |
|-------------------------------------------------------------|-------------|-----------------------|-----------------------------------------------------------------------------|-----------|----------------|----------------------------------------|
|                                                             | Gene Name   | Protein name          |                                                                             | Gene name | Protein name   |                                        |
| <b>Fertilization, Embryo pre-implantation, Implantation</b> | only A      | C17orf75              |                                                                             | only B    | DEFB121        | Beta-defensin 121                      |
|                                                             | only A      | KLK12                 | Kallikrein-12                                                               |           |                |                                        |
|                                                             | only A      | LAMC1                 | Laminin subunit gamma-1                                                     |           |                |                                        |
|                                                             | only A      | PSMD4                 | 26S proteasome non-ATPase regulatory subunit 4                              |           |                |                                        |
|                                                             | only A      | RANGAP1               | Ran GTPase-activating protein 1                                             |           |                |                                        |
|                                                             |             | <b>FAAH2</b>          | Fatty-acid amide hydrolase 2                                                |           |                |                                        |
|                                                             |             | <b>CALM2;CALM1</b>    | Calmodulin                                                                  |           |                |                                        |
|                                                             |             | UCHL1                 | Ubiquitin carboxyl-terminal hydrolase isozyme L1                            |           |                |                                        |
|                                                             | <b>CSTA</b> | Cystatin-A            |                                                                             |           |                |                                        |
| <b>Embryo development</b>                                   | only A      | <b>AMY1A;AMY2A...</b> | Alpha-amylase 1;Pancreatic alpha-amylase;Alpha-amylase 2B                   | only B    | DAB1           | Isoform DAB553 of Disabled homolog 1   |
|                                                             | only A      | ATR                   | Serine/threonine-protein kinase ATR                                         | only B    | OFD1           | Oral-facial-digital syndrome 1 protein |
|                                                             | only A      | KIF21A                | Kinesin-like protein KIF21A                                                 |           |                |                                        |
|                                                             | only A      | <b>LTF</b>            | Lactotransferrin;Kaliocin-1;Lactoferroxin-A;Lactoferroxin-B;Lactoferroxin-C | only B    | <b>SOX2</b>    | Transcription factor SOX-2             |
|                                                             | only A      | MSI2                  | RNA-binding protein Musashi homolog 2                                       | only B    | GPC3           | Glypican-3;Secreted glypican-3         |
|                                                             | only A      | NR0B1                 | Nuclear receptor subfamily 0 group B member 1                               | only B    | <b>MUCL1</b>   | Mucin-like protein 1                   |
|                                                             | only A      | SLC4A5                | Electrogenic sodium bicarbonate cotransporter 4                             | only B    | CEP89          | Centrosomal protein of 89 kDa          |
|                                                             | only A      | UNC45A                | Protein unc-45 homolog A                                                    |           | BROMI;C6orf170 | Protein broad-minded                   |
|                                                             |             | <b>DSG1</b>           | Desmoglein-1                                                                |           | <b>UBQLN2</b>  | Ubiquilin-2                            |
|                                                             |             | <b>GALNT9</b>         | Polypeptide N-acetylgalactosaminyltransferase 9                             |           | MYO1E          | Unconventional myosin-Ie               |
|                                                             |             | SLC2A5                | Solute carrier family 2, facilitated glucose transporter member 5           |           | EVL            | Ena/VASP-like protein                  |
|                                                             |             | CDSN                  | Corneodesmosin                                                              |           | <b>JUP</b>     | Junction plakoglobin                   |

|                      |                                                              |
|----------------------|--------------------------------------------------------------|
| <b>INS-IGF2;INS</b>  | Insulin;Insulin B chain;Insulin A chain                      |
| <b>S100A8</b>        | Protein S100-A8                                              |
| <b>BAIAP2</b>        | Brain-specific angiogenesis inhibitor 1-associated protein 2 |
| <b>TNRC6C</b>        | Trinucleotide repeat-containing gene 6C protein              |
| MEIS1                | Homeobox protein Meis1                                       |
| <b>BORA;FLJ22624</b> | Protein aurora borealis                                      |
| CEP250               | Centrosome-associated protein CEP250                         |
| ALDH1A2              | Isoform 3 of Retinal dehydrogenase 2                         |
| PAM                  | Peptidyl-glycine alpha-amidating monooxygenase....           |
| <b>PRSS1</b>         | Trypsin-1;Alpha-trypsin chain 1;Alpha-trypsin chain 2        |
| <b>HMCN1</b>         | Hemicentin-1                                                 |
| <b>SBSN</b>          | Suprabasin                                                   |
| <b>LCN1;LCNIP1</b>   | Lipocalin-1;Putative lipocalin 1-like protein 1              |
| <b>DMBT1</b>         | Deleted in malignant brain tumors 1 protein                  |
| <b>PMCH</b>          | Pro-MCH;Neuropeptide-glycine-glutamic acid...                |

#### Nucleic Acid interaction

|        |              |                                          |        |                                      |                                                                                                   |
|--------|--------------|------------------------------------------|--------|--------------------------------------|---------------------------------------------------------------------------------------------------|
| only A | <b>PCGF1</b> | Polycomb group RING finger protein 1     | only B | <b>H2AFX;HIST1H2AA;HIST1H2AB....</b> | Histone H2A.x;Histone H2A type 1-A;Histone H2A type 1-B/E;Histone H2A type 1.....                 |
|        | <b>NRBF2</b> | Nuclear receptor-binding factor 2        | only B | <b>HIST1H4A</b>                      | Histone H4                                                                                        |
|        | NFIB         | Nuclear factor 1;Nuclear factor 1 B-type | only B | <b>EEF1A2;EEF1A1;EEF1A1P5</b>        | Elongation factor 1-alpha 2;Elongation factor 1-alpha 1;Putative elongation factor 1-alpha-like 3 |
|        |              |                                          | only B | <b>HIST2H2BF;HIST1H2BK....</b>       | Histone H2B;Histone H2B type 1-K;Histone H2B type 1-J;Histone H2B type 1-O.....                   |
|        |              |                                          |        | BEND4                                | BEN domain-containing protein 4                                                                   |

#### Signalling

|        |                 |                                                                 |        |              |                                                                  |
|--------|-----------------|-----------------------------------------------------------------|--------|--------------|------------------------------------------------------------------|
| only A | DOCK4           | Dedicator of cytokinesis protein 4                              | only B | PLCB4        | 1-phosphatidylinositol 4,5-bisphosphate phosphodiesterase beta-4 |
| only A | EIF2AK1         | Eukaryotic translation initiation factor 2-alpha kinase 1       | only B | GPR160       | Probable G-protein coupled receptor 160                          |
| only A | <b>EIF4EBP2</b> | Eukaryotic translation initiation factor 4E-binding protein 2   |        | <b>SH2B1</b> | SH2B adapter protein 1                                           |
| only A | TREML2          | Trem-like transcript 2 protein                                  |        | PPP1R8       | Isoform Gamma of Nuclear inhibitor of protein phosphatase 1      |
| only A | ZAK             | Isoform 2 of Mitogen-activated protein kinase kinase kinase MLT |        |              |                                                                  |
| only A | ZFAND6          | AN1-type zinc finger protein 6                                  |        |              |                                                                  |
| only A | NGFRAP1         | Isoform 2 of Protein BEX3                                       |        |              |                                                                  |
|        | <b>PTCH1</b>    | Isoform S of Protein patched homolog 1                          |        |              |                                                                  |

|                        |        |                                 |                                                                      |        |              |                                                            |
|------------------------|--------|---------------------------------|----------------------------------------------------------------------|--------|--------------|------------------------------------------------------------|
| <b>Uncharacterized</b> | only A | <b>C3orf51</b>                  | Putative uncharacterized protein C3orf51                             | only B | NCRNA00204   | Putative uncharacterized protein CXorf52B                  |
|                        | only A | <b>XKR4</b>                     | XK-related protein 4                                                 | only B | PCNXL3       | Pecanex-like protein 3                                     |
|                        | only A | FAM189A1                        | Isoform 2 of Protein FAM189A1                                        |        |              |                                                            |
|                        |        | C9orf43                         | Uncharacterized protein C9orf43                                      |        |              |                                                            |
|                        |        | KIAA1671                        | Uncharacterized protein KIAA1671                                     |        |              |                                                            |
|                        |        | <b>HEATR8</b>                   | Maestro heat-like repeat-containing protein family member 7          |        |              |                                                            |
|                        |        | <b>CCDC77</b>                   | Coiled-coil domain-containing protein 77                             |        |              |                                                            |
|                        |        | <b>MORC4</b>                    | MORC family CW-type zinc finger protein 4                            |        |              |                                                            |
| <b>Others</b>          | only A | ISCU                            | Isoform 2 of Iron-sulfur cluster assembly enzyme ISCU, mitochondrial | only B | C1orf61      | Protein CROC-4                                             |
|                        | only A | <b>KCTD2</b>                    | BTB/POZ domain-containing protein KCTD2                              |        | MAT2B        | Isoform 5 of Methionine adenosyltransferase 2 subunit beta |
|                        | only A | KLHL17                          | Kelch-like protein 17                                                |        | <b>CHGB</b>  | Secretogranin-1;GAWK peptide;CCB peptide                   |
|                        | only A | MAGEC3                          | MAGEC3 protein                                                       |        | SLC35B3      | Adenosine 3-phospho 5-phosphosulfate transporter 2         |
|                        | only A | <b>MPDZ</b>                     | Multiple PDZ domain protein                                          |        | <b>SSFA2</b> | Sperm-specific antigen 2                                   |
|                        | only A | SCGB2A1                         | Mammaglobin-B                                                        |        | AANAT        | Serotonin N-acetyltransferase                              |
|                        | only A | <b>SPINK5</b>                   | Isoform long of Serine protease inhibitor Kazal-type 5               |        | <b>KPRP</b>  | Keratinocyte proline-rich protein                          |
|                        | only A | AKT1S1                          | Isoform 3 of Proline-rich AKT1 substrate 1                           |        | <b>PDZD4</b> | PDZ domain-containing protein 4                            |
|                        |        | <b>LCN10</b>                    | Epididymal-specific lipocalin-10                                     |        | EPG5         | Ectopic P granules protein 5 homolog                       |
|                        |        | <b>UBC;UBB;RPS27A;UBA52</b>     | Polyubiquitin-C;Ubiquitin;Polyubiquitin-B;Ubiquitin.....             |        | INADL        | Isoform 5 of InaD-like protein                             |
|                        |        | <b>MFSD9</b>                    | Major facilitator superfamily domain-containing protein 9            |        |              |                                                            |
|                        |        | <b>IFNA10;IFNA21;IFNA17....</b> | Interferon alpha-10;Interferon alpha-21....                          |        |              |                                                            |
|                        |        | <b>RNF223</b>                   | RING finger protein 223                                              |        |              |                                                            |
|                        |        | CEP112                          | Centrosomal protein of 112 kDa                                       |        |              |                                                            |
|                        |        | <b>LYZ</b>                      | Lysozyme C                                                           |        |              |                                                            |
|                        |        | <b>DCD</b>                      | Dermcidin;Survival-promoting peptide;DCD-1                           |        |              |                                                            |
|                        |        | CALML5                          | Calmodulin-like protein 5                                            |        |              |                                                            |
|                        |        | <b>S100A7;S100A7A</b>           | Protein S100-A7;Protein S100-A7A                                     |        |              |                                                            |
|                        |        | LETM1                           | LETM1 and EF-hand domain-containing protein 1, mitochondrial         |        |              |                                                            |
|                        |        | <b>ADAMTS17</b>                 | A disintegrin and metalloproteinase with thrombospondin motifs 17    |        |              |                                                            |
|                        |        | <b>GOLM1</b>                    | Golgi membrane protein 1                                             |        |              |                                                            |
